# Supplementary material
Source: PubMed Central journal article supplement (PMC3098706)
Supplement: tjp0589-2321-SD1.pdf [file tjp0589-2321-SD1.pdf]

## SUPPLEMENTAL MATERIAL

### **Ectopic expression of cone-specific G-protein-coupled receptor kinase GRK7 in zebrafish rods leads to lower photosensitivity and altered responses**

F. Vogalis<sup>\*,1,2</sup>, T. Shiraki<sup>\*,3</sup>, D. Kojima<sup>\*,3</sup>, Y. Wada<sup>3</sup>, Y. Nishiwaki<sup>4</sup>, J.L.P. Jarvinen<sup>5,1,2</sup>, J. Sugiyama<sup>3</sup>, K. Kawakami<sup>6,7</sup>, I. Masai<sup>4</sup>, S. Kawamura<sup>8,9</sup>, Y. Fukada<sup>3</sup> and T.D. Lamb<sup>1,2</sup>

<sup>\*</sup>Contributed equally.

<sup>1</sup>*Department of Neuroscience, John Curtin School of Medical Research, and*  
<sup>2</sup>*ARC Centre of Excellence in Vision Science, The Australian National University,*  
*Canberra, ACT 0200, Australia;*

<sup>3</sup>*Department of Biophysics and Biochemistry, Graduate School of Science,*  
*University of Tokyo, Hongo 7-3-1, Bunkyo-Ku, Tokyo 113-0033, Japan;*

<sup>4</sup>*Developmental Neurobiology Unit, Okinawa Institute of Science and Technology Promotion*  
*Corporation (OIST), 1919-1 Azatancha, Onna, Okinawa 904-0412, Japan;*

<sup>5</sup>*Faculty of Life and Social Sciences, Swinburne University of Technology,*  
*Hawthorn, VIC 3122, Australia;*

<sup>6</sup>*Division of Molecular and Developmental Biology, National Institute of Genetics and*

<sup>7</sup>*Department of Genetics, The Graduate University for Advanced Studies (SOKENDAI),*  
*Mishima, Shizuoka 411-8540, Japan;*

<sup>8</sup>*Graduate School of Frontier Biosciences and*<sup>9</sup>*Department of Biology,*  
*Graduate School of Science, Osaka University, Suita, Osaka 565-0871, Japan*

Containing:

**Supplemental Figures S1–S5**

and

**Captions for Movies 1 and 2**

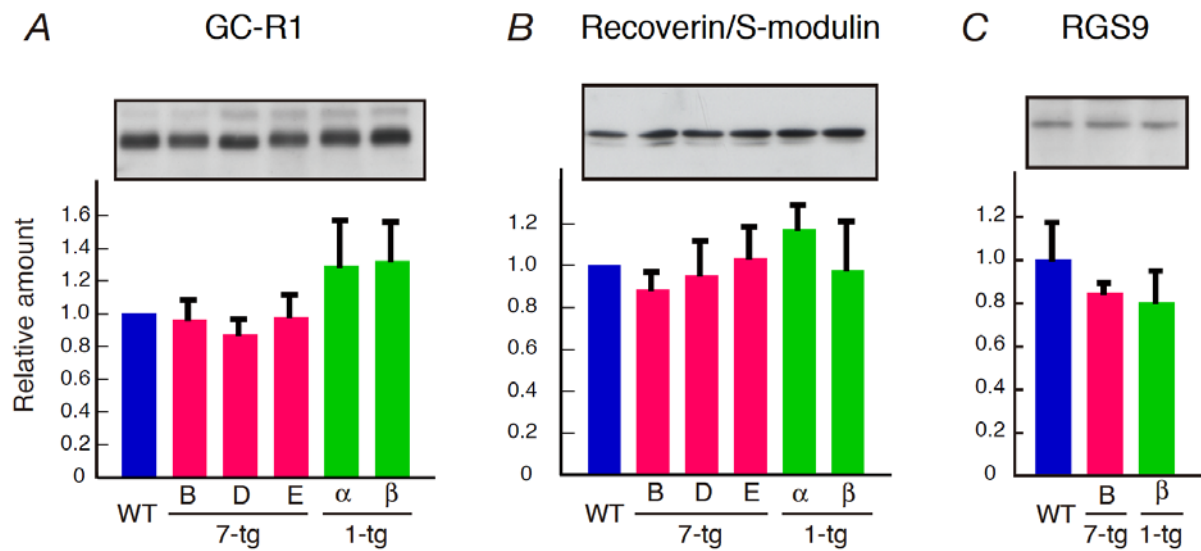

**Figure S1.** Expression levels of phototransduction proteins in the eyes (or the retinas) of WT, GRK7-tg and GRK1-tg zebrafish. **A**, rod guanylate cyclase (GC-R1) in the eyes; **B**, Recoverin/S-modulin in the eyes; **C**, RGS9 in the retinas. Typical immunoblot images from wild-type and transgenic zebrafish are shown (top panels). Protein amounts of the tissue homogenates loaded on the gels were 12.8  $\mu$ g (**A**), 6.4  $\mu$ g (**B**) and 8.0  $\mu$ g (**C**). The band densities were quantified to estimate the protein expression levels, and the averages from three to five independent experiments are shown with SEM after normalized to those from wild-type (bottom panels).

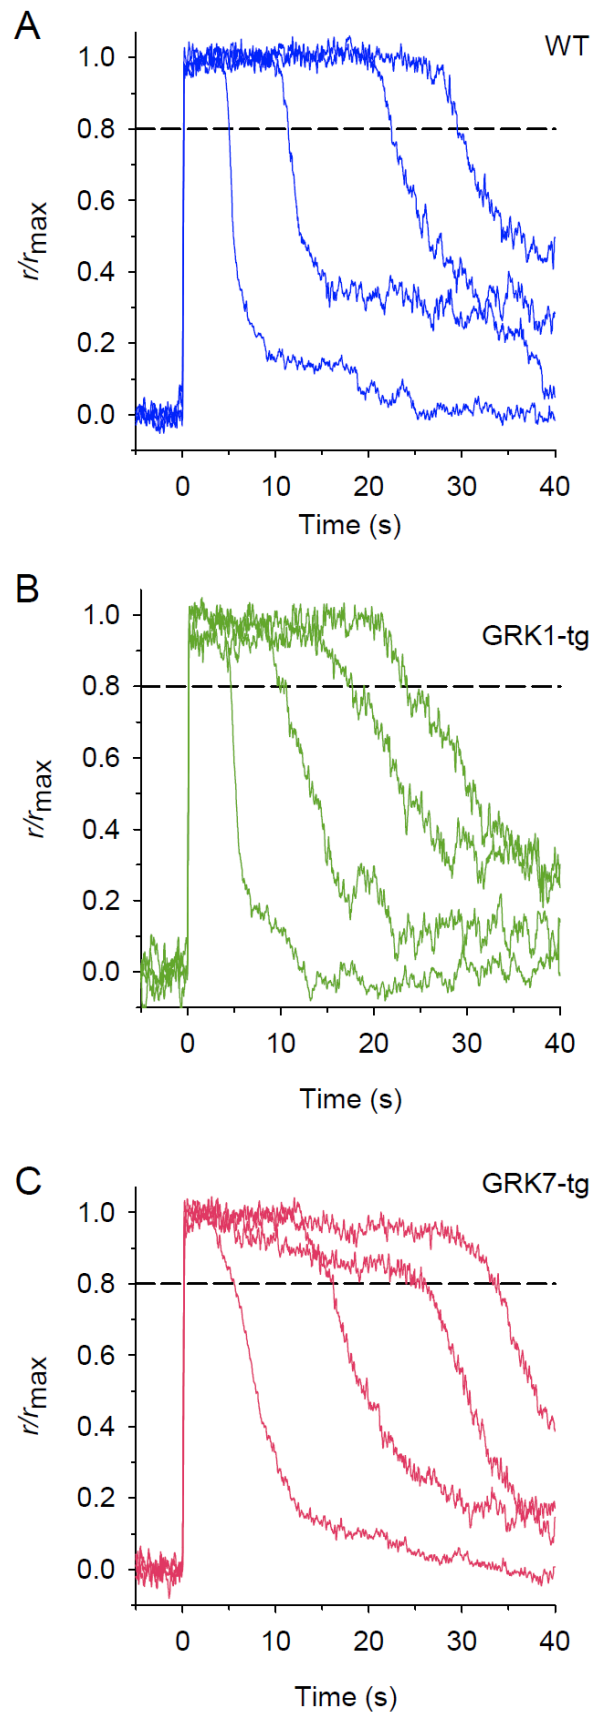

**Figure S2.** Responses to intense flashes from a representative rod for each genotype; these rods are the same as in Figure 3. **A**, WT; **B**, GRK1-tg; **C**, GRK7-tg. Flash intensities were: 1,800, 18,000, 70,000, and 143,000 photons  $\mu\text{m}^{-2}$ .

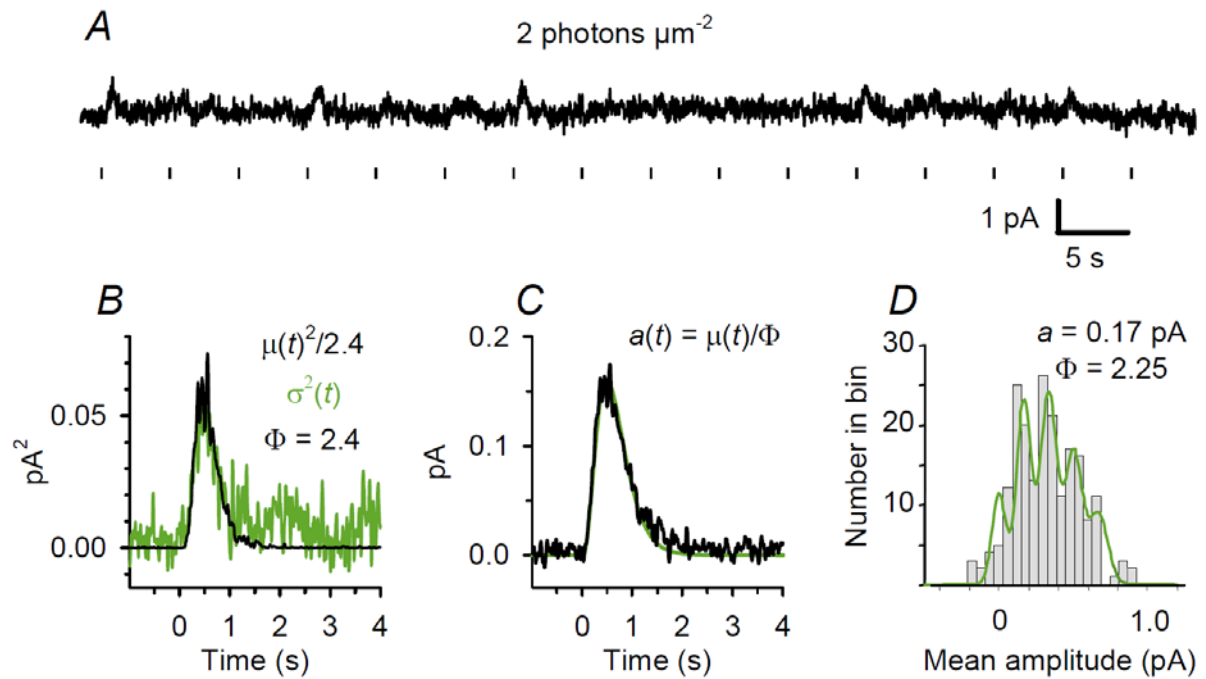

**Figure S3.** Analysis of quantal responses in a GRK1-tg rod. **A**, Set of 16 consecutive responses from a GRK1-tg rod for flashes of fixed dim intensity ( $\sim 2$  photons  $\mu\text{m}^{-2}$ ) delivered at 5 s intervals, as indicated by vertical markers below the trace. **B–D**, Variance analysis and histogram analysis on 199 responses of the kind illustrated in **A**. **B**, Ensemble variance,  $\sigma^2(t)$  (green trace), together with a scaled version of the square of the mean response,  $\mu(t)^2$  (black trace); with a scaling factor of  $1/2.4$  the two traces coincided closely, yielding an estimate for the number of photoisomerizations as  $\Phi = 2.4$ ; see eqn (4a). **C**, Estimated quantal response,  $a(t)$ , obtained by dividing the mean response by the estimate for  $\Phi$ ; see eqn (4b). The green curve plots the Poisson kinetics of eqn (3), with amplitude  $r_{\text{peak}} = 0.16$  pA,  $t_{\text{peak}} = 0.5$  s, and  $n = 4$ . **D**, Amplitude histogram for the 199 responses, measured over a window 0.5 s wide centered at  $t_{\text{peak}}$ , and using a bin width of 0.05 pA. The green curve plots the sum of Poisson-weighted Gaussian components, using parameters:  $a = 0.17$  pA;  $\Phi = 2.25$ ;  $\sigma_0 = 0.045$  pA;  $\sigma_1 = 0.02$  pA.

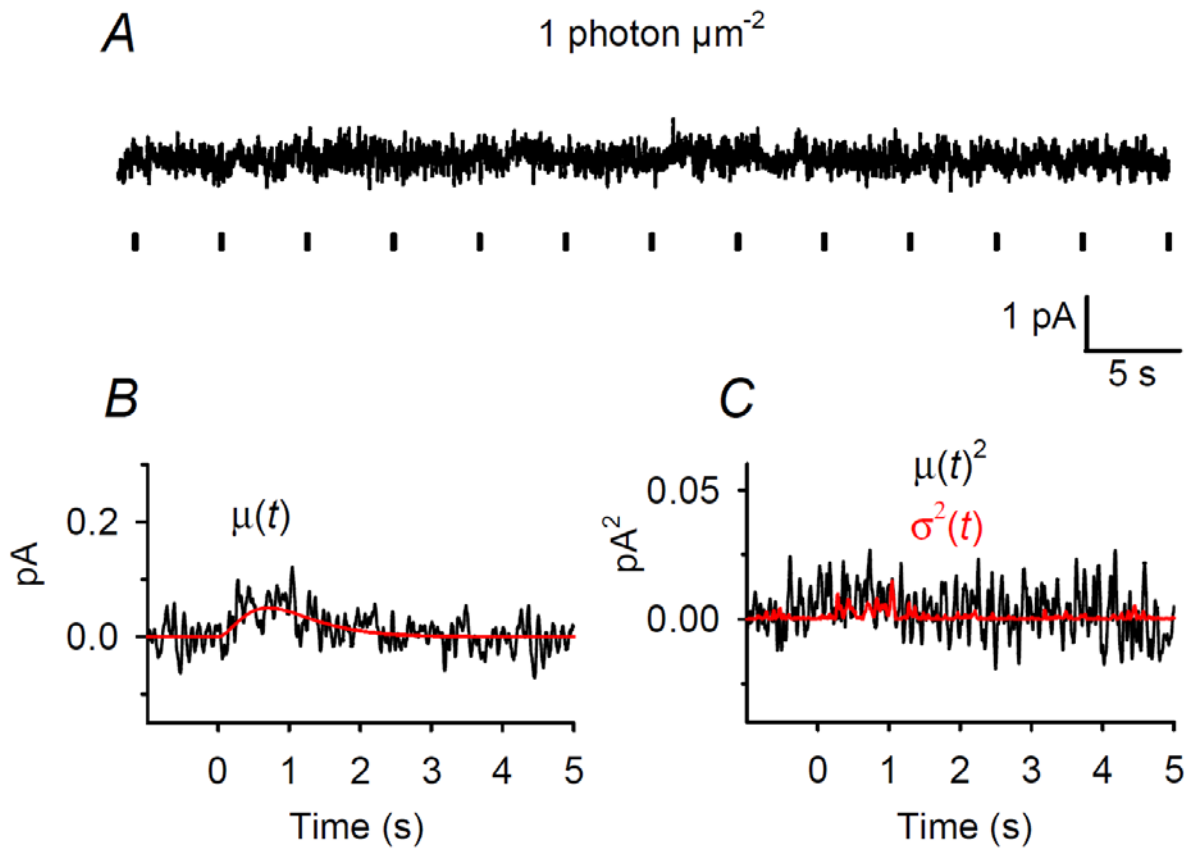

**Figure S4.** Preliminary analysis of quantal responses in a GRK7-tg zebrafish rod tested with 100 trials at a low intensity of  $\sim 1$  photon  $\mu\text{m}^{-2}$ . **A**, Sample consecutive responses. **B**, Ensemble mean. The red curve plots the Poisson kinetics of eqn (3), with amplitude  $r_{\text{peak}} = 0.05$  pA,  $t_{\text{peak}} = 0.71$  s, and  $n = 4$ . **C**, Ensemble variance,  $\sigma^2(t)$  (red trace), together with the square of the mean response,  $\mu(t)^2$  (black trace).

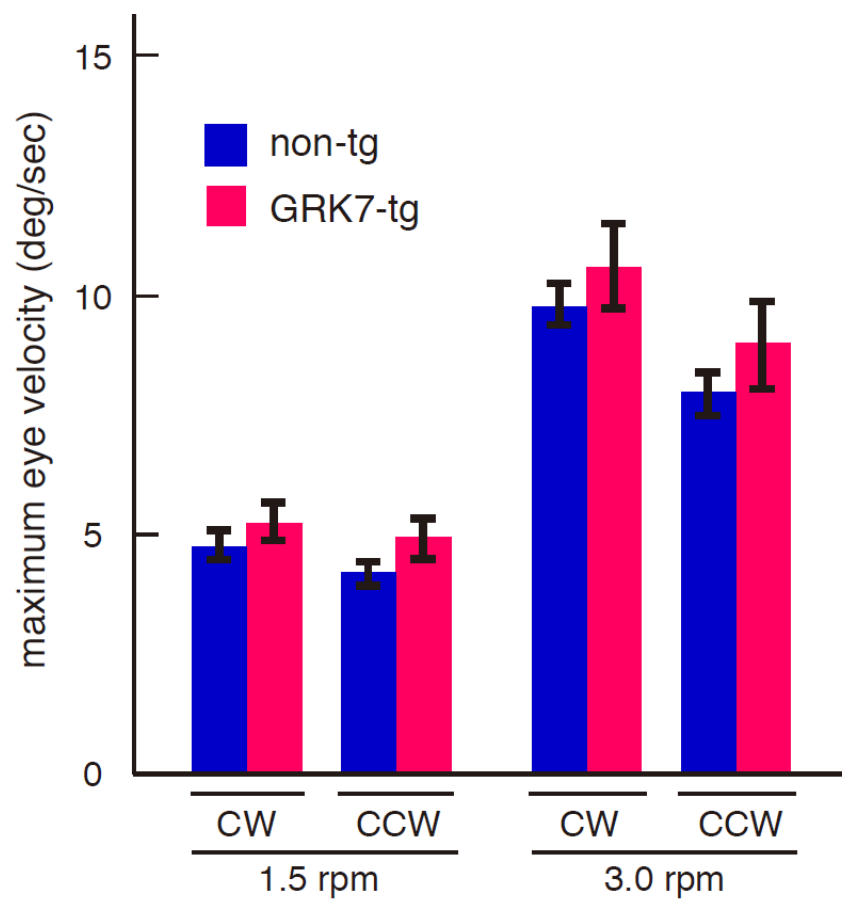

**Figure S5.** The maximum velocity of eye movements in rod-mediated OKR. The mean eye velocity was calculated for each intensity and the highest velocity among all the conditions was defined as the maximum velocity for each larva. Averages with SEM from 16 GRK7B-tg fish and 19 non-tg fish are shown.

**Movie captions and screenshots**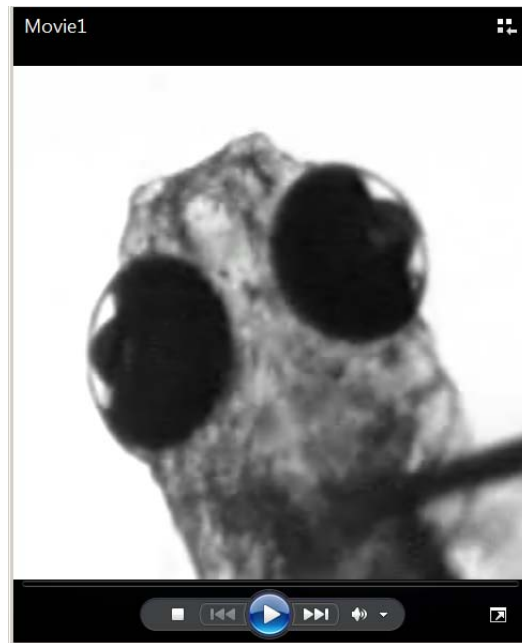

**Movie 1.** Compressed version ( $10 \text{ frames s}^{-1}$ ) of original OKR movie (at  $29.7 \text{ frames s}^{-1}$ ) used for the calculation of eye orientation and eye velocity in the right-hand panels (3 rpm stimulus) of Figure 9A. This movie is for the upper row of the two eye angle panels, obtained at the dimmer level of  $-2.0 \text{ log relative light intensity}$ , which elicited clear optokinetic responses.

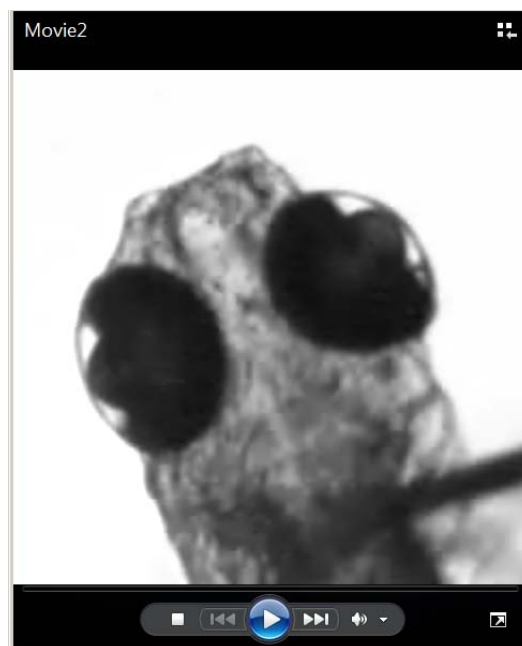

**Movie 2.** OKR movie, similar to Movie 1, except at the brighter level of  $-0.9 \text{ log relative light intensity}$  (i.e. lower row of the two eye angle panels in Figure 9A right). No optokinetic response was apparent; the slight slow drift between saccades was not correlated with drum rotation.
